# Supplementary material for: Unraveling the Uncharacterized Domain of Carocin S2: A Ribonuclease Pectobacterium carotovorum subsp. carotovorum Bacteriocin
Source: MDPI journal article supplement (doi:10.3390/microorganisms10020359), 2022-02-04
Supplement: s1 [file s1]

A

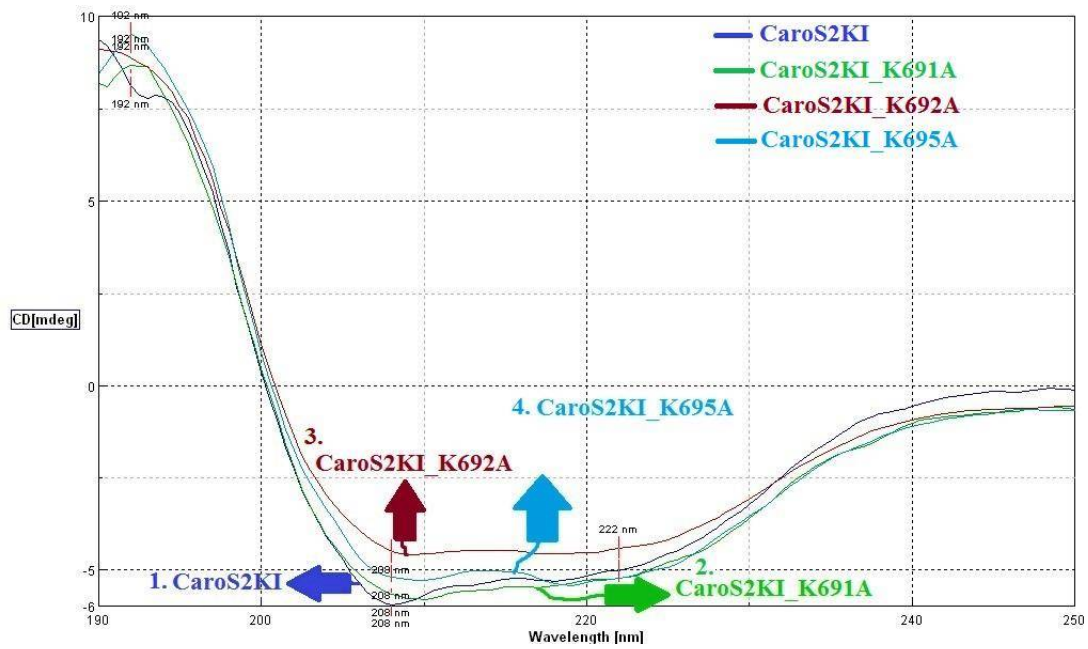

B

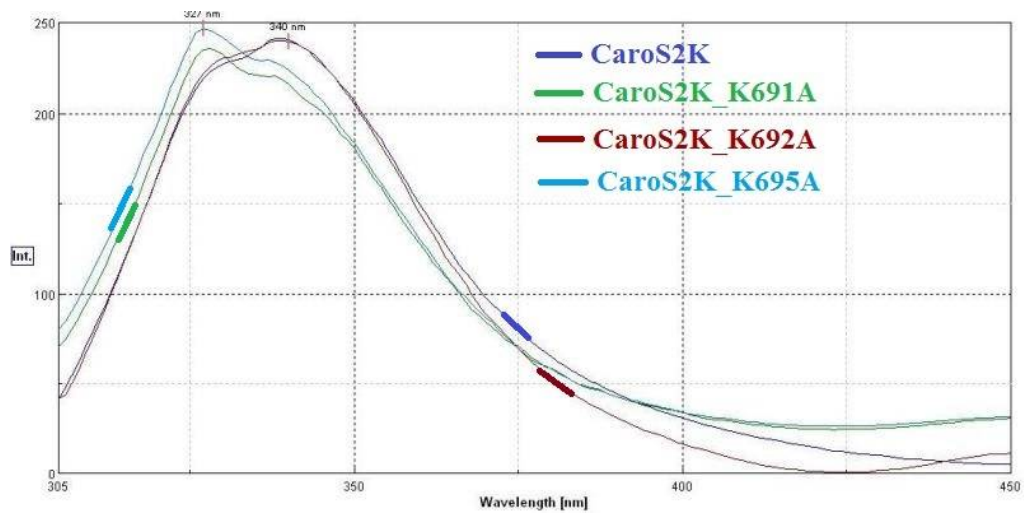

**Supplementary material, Figure S1. Structure analysis of the CaroS2K and its related mutants. (A) CD spectroscopy comparison chart of CaroS2K and Lysine residue mutants (B) ITF comparison of CaroS2K with Lysine residues.**

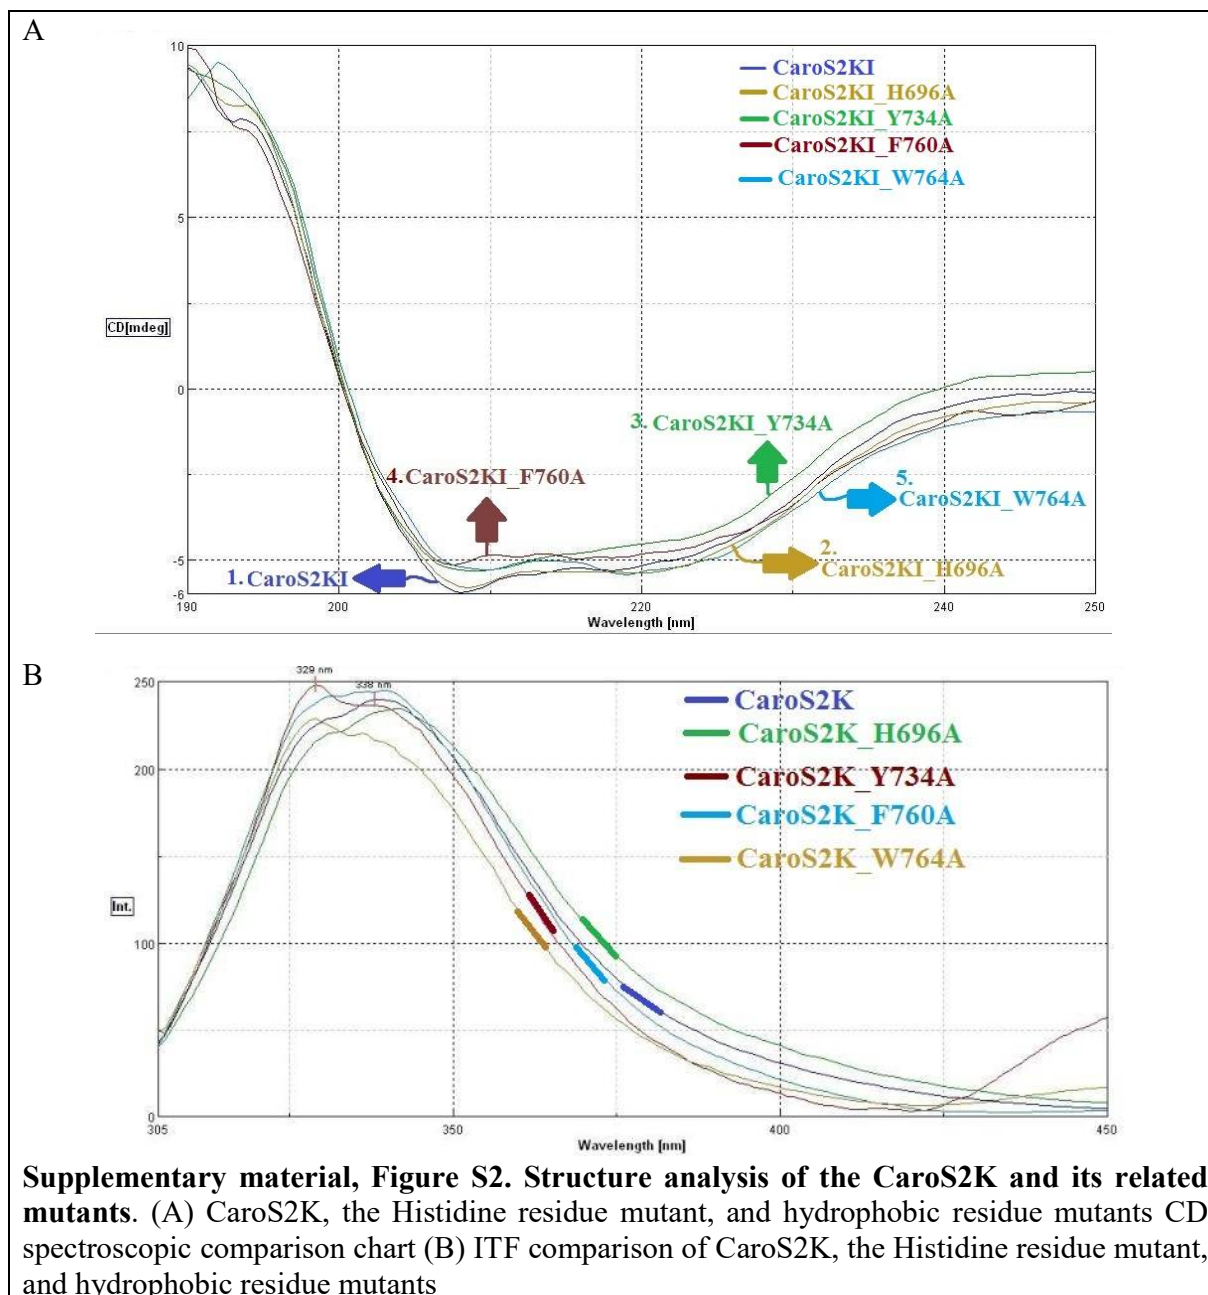

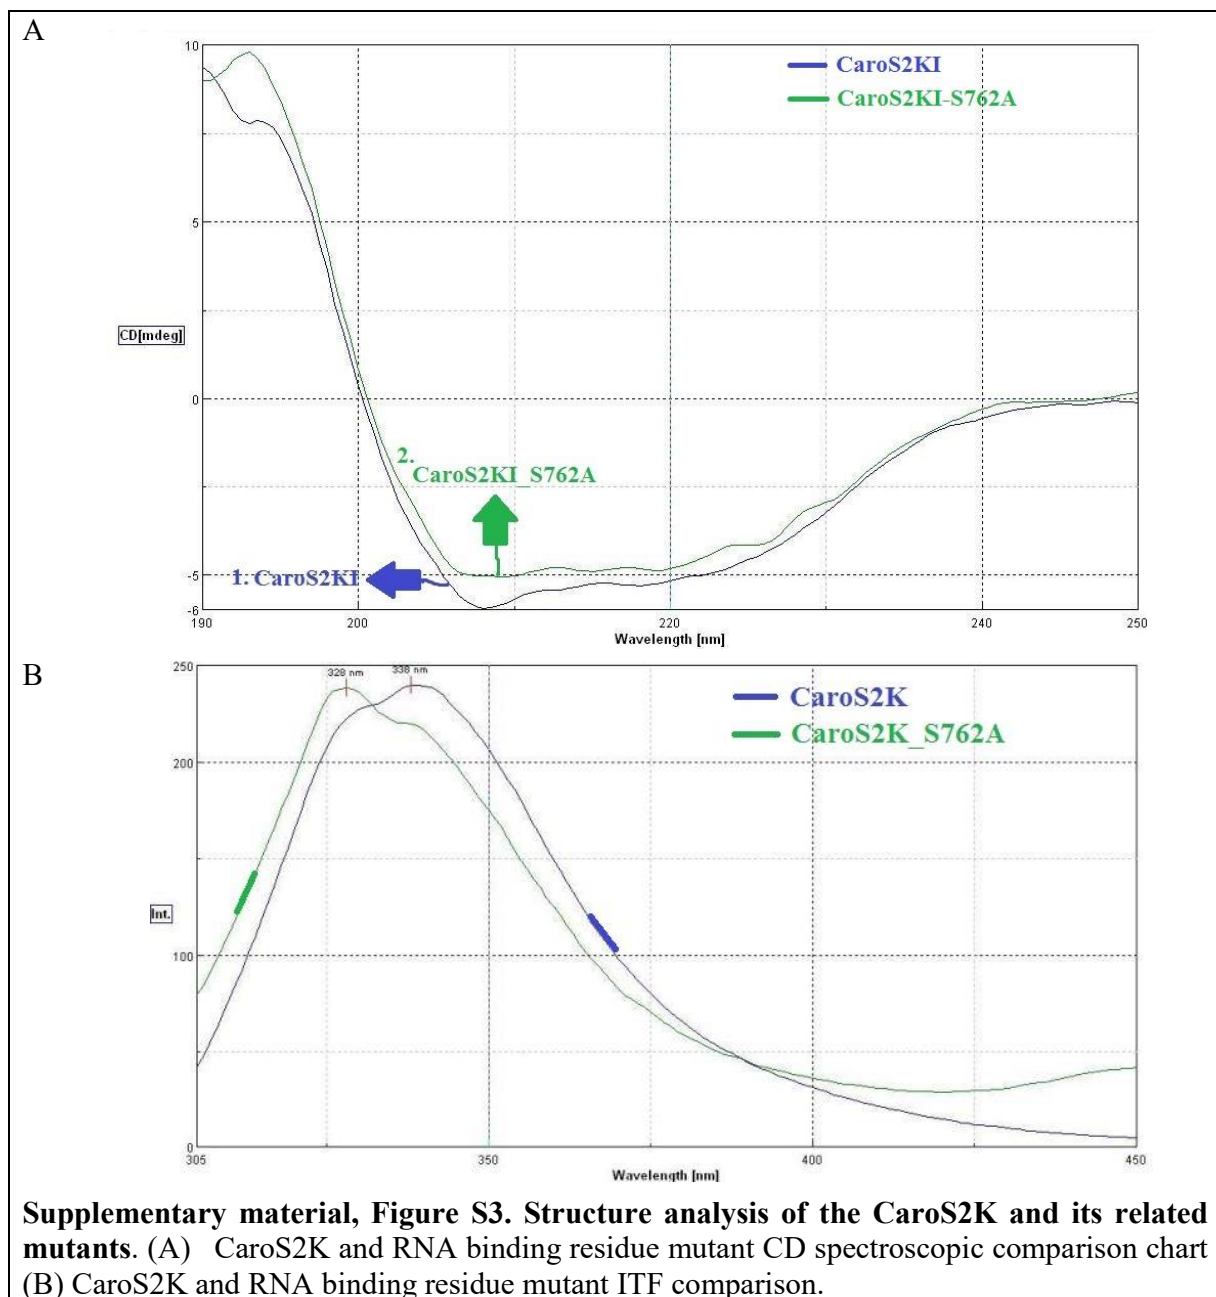



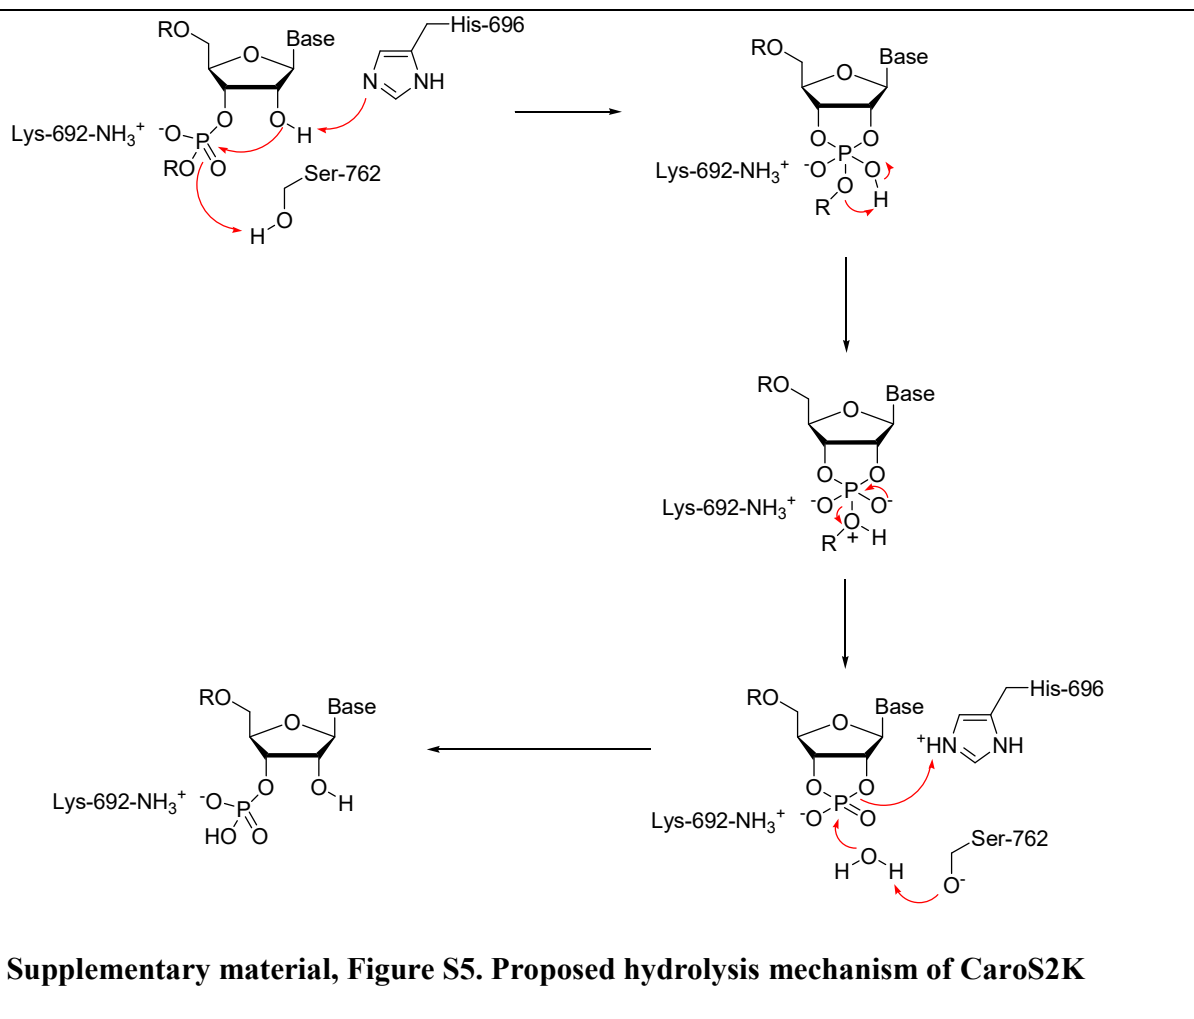

**Supplementary material, Table S1.** Plasmids used in this study

| <b>Strain or Plasmid</b> | <b>Relevant characteristics</b>                                  | <b>Source of reference</b> |
|--------------------------|------------------------------------------------------------------|----------------------------|
| pES2TKD677_Q688A         | Derived from pES2TKD677 with Ala substitution from position Q688 | This study                 |
| pES2TKD677_K691A         | Derived from pES2TKD677 with Ala substitution from position K691 | This study                 |
| pES2TKD677_K692A         | Derived from pES2TKD677 with Ala substitution from position K692 | This study                 |
| pES2TKD677_K695A         | Derived from pES2TKD677 with Ala substitution from position K695 | This study                 |
| pES2TKD677_H696A         | Derived from pES2TKD677 with Ala substitution from position H696 | This study                 |
| pES2TKD677_Y734A         | Derived from pES2TKD677 with Ala substitution from position Y734 | This study                 |
| pES2TKD677_F760A         | Derived from pES2TKD677 with Ala substitution from position F760 | This study                 |
| pES2TKD677_S762A         | Derived from pES2TKD677 with Ala substitution from position S762 | This study                 |
| pES2TKD677_W764A         | Derived from pES2TKD677 with Ala substitution from position Q688 | This study                 |

**Supplementary material, Table S2.** Primers used in this study.

---

|               |                                           |
|---------------|-------------------------------------------|
| S2_H696A_forT | GTATCTTAAAGCTGCCAAAGATTTTGGTATTGTTGATACC  |
| S2_H696A_forS | TTTTGGTATTGTTGATACC                       |
| S2_H696A_revT | TCTTTGGCAGCTTTAAGATACTTTTTGTCCAGTTGCTTACG |
| S2_H696A_revS | TTTTTGTCAGTTGCTTACG                       |
| S2_K698A_forT | AACATGCCGCAGATTTTGGTATTGTTGATACCAGAA      |
| S2_K698A_forS | TATTGTTGATACCAGAA                         |
| S2_K698A_revT | CCAAAATCTGCGGCATGTTTAAAGATACTTTTTGTCCAG   |
| S2_K698A_revS | TAAGATACTTTTTGTCCAG                       |
| S2_R320A_forT | GCTGCGGAGGCCAAAATTAAGTAAATCCACCAAGTGATC   |
| S2_R320A_forS | TGAAATCCACCAAGTGATC                       |
| S2_R320A_revT | GTAAATTTTGCTCCGCAGCGGTAATTGGATGTCTCAAC    |
| S2_R320A_revS | GGTAATTGGATGTCTCAAC                       |
| S2_K321A_forT | GCGGAGCGAGCATTAACTGAAATCCACCAAGTGATCTC    |
| S2_K321A_forS | AATCCACCAAGTGATCTC                        |
| S2_K321A_revT | TCAGTTAATGCTCGCTCCGCAGCGGTAATTGGATGTCTC   |
| S2_K321A_revS | AGCGGTAATTGGATGTCTC                       |
| S2_T323A_forT | CGAAAATTAGCTGAAATCCACCAAGTGATCTCTTTTGC    |
| S2_T323A_forS | ACCAAGTGATCTCTTTTGC                       |
| S2_T323A_revT | GGATTTTCAGCTAATTTTCGCTCCGCAGCGGTAATTGG    |
| S2_T323A_revS | CTCCGCAGCGGTAATTGG                        |
| S2_K346A_forT | CCATTTTCAGGAGCAACTAAAAGTGTGCGGTTTACCAAG   |
| S2_K346A_forS | TGTTGCGGTTTACCAAG                         |
| S2_K346A_revT | GTTTTAGTTGCTCCTGAAATGGTTGCGGCAGAGCTTTCTT  |
| S2_K346A_revS | TTGCGGCAGAGCTTTCTT                        |
| S2_T347A_forT | TCAGGAAAAGCTAAAAGTGTGCGGTTTACCAAGAACAG    |
| S2_T347A_forS | TGCGGTTTACCAAGAACAG                       |
| S2_T347A_revT | ACAGTTTTAGCTTTTCTGAAATGGTTGCGGCAGAGCT     |
| S2_T347A_revS | AATGGTTGCGGCAGAGCT                        |
| S2_R550A_forT | CTTCCCATTGCTCTGGCATTCTTCTGATGAGAATGGAG    |
| S2_R550A_forS | TTTCTGATGAGAATGGAG                        |
| S2_R550A_revT | ATGCCAGAGCAATGGGAAGATCCAGACTTCCATTTTTC    |
| S2_R550A_revS | ATCCAGACTTCCATTTTTC                       |
| S2_T685A_forT | GATCGGTTTGCTCGTAAGCAACTGGACAAAAAGTATCT    |
| S2_T685A_forS | AACTGGACAAAAAGTATCT                       |
| S2_T685A_revT | GCTTACGAGCAAACCGATCTGAATCCAAGGGATCGTT     |
| S2_T685A_revS | TGAATCCAAGGGATCGTT                        |
| S2_K687A_forT | GTTTACTCGTGCGCAACTGGACAAAAAGTATCTTAAAC    |
| S2_K687A_forS | ACAAAAAGTATCTTAAAC                        |
| S2_K687A_revT | CCAGTTGCGCACGAGTAAACCGATCTGAATCCAAGGGA    |
| S2_K687A_revS | CGATCTGAATCCAAGGGA                        |
| S2_Q688A_forT | ACTCGTAAGGCACTGGACAAAAAGTATCTTAAACATGC    |
| S2_Q688A_forS | AAAGTATCTTAAACATGC                        |
| S2_Q688A_revT | TTGTCCAGTGCCTTACGAGTAAACCGATCTGAATCCAAGG  |
| S2_Q688A_revS | AAACCGATCTGAATCCAAGG                      |

---

|               |                                           |
|---------------|-------------------------------------------|
| S2_K691A_forT | CAACTGGACGCAAAGTATCTTAAACATGCCAAAGATTTTGG |
| S2_K691A_forS | TAAACATGCCAAAGATTTTGG                     |
| S2_K691A_revT | AGATACTTTGCGTCCAGTTGCTTACGAGTAAACCGATC    |
| S2_K691A_revS | CTTACGAGTAAACCGATC                        |
| S2_K692A_forT | CTGGACAAAGCGTATCTTAAACATGCCAAAGATTTTGGTA  |
| S2_K692A_forS | ATGCCAAAGATTTTGGTA                        |
| S2_K692A_revT | GTTTAAGATACGCTTTGTCCAGTTGCTTACGAGTAAACCG  |
| S2_K692A_revS | TTGCTTACGAGTAAACCG                        |
| S2_D699A_forT | CATGCCAAAGCTTTTGGTATTGTTGATACCAGAAAAAATAG |
| S2_D699A_forS | TTGATACCAGAAAAAATAG                       |
| S2_D699A_revT | CAATACCAAAAGCTTTGGCATGTTTAAGATACTTTTTGTC  |
| S2_D699A_revS | TTTAAGATACTTTTTGTC                        |
| S2_R706A_forT | GTTGATACCGCAAAAAATAGTGAAACACTGACTAAATTTAG |
| S2_R706A_forS | AAACACTGACTAAATTTAG                       |
| S2_R706A_revT | CACTATTTTTTGCGGTATCAACAATACCAAAATCCTTTGG  |
| S2_R706A_revS | AATACCAAAATCCTTTGG                        |
| S2_K707A_forT | GATACCAGAGCAAATAGTGAAACACTGACTAAATTTAG    |
| S2_K707A_forS | AACACTGACTAAATTTAG                        |
| S2_K707A_revT | TCACTATTTGCTCTGGTATCAACAATACCAAAATCCTTTGG |
| S2_K707A_revS | AACAATACCAAAATCCTTTGG                     |
| S2_S709A_forT | CAGAAAAAATGCTGAAACACTGACTAAATTTAGAGACGC   |
| S2_S709A_forS | TGACTAAATTTAGAGACGC                       |
| S2_S709A_revT | GTGTTTCAGCATTTTTTCTGGTATCAACAATACCAA      |
| S2_Y734A_forT | AAGGGACAGCTCTACTTGTGAAGGATTCAAAGGTTTTTC   |
| S2_Y734A_forS | AAGGATTCAAAGGTTTTTC                       |
| S2_Y734A_revT | CACAAGTAGAGCTGTCCCTTTTTCAAAGTTTCTTTTTCC   |
| S2_Y734A_revS | TTTCAAAGTTTCTTTTTCC                       |
| S2_S740A_forT | GTGAAGGATGCAAAGGTTTTCTTTAACCCGAAGACGAA    |
| S2_S740A_forS | TTTAACCCGAAGACGAA                         |
| S2_S740A_revT | GAAAACCTTTGCATCCTTCACAAGTAGATATGTCCCT     |
| S2_S740A_revS | AAGTAGATATGTCCCT                          |
| S2_D755A_forT | GTTGTCATGGCTAAGGATAATAAATTTATTTCCGGTTGG   |
| S2_D755A_forS | AAATTTATTTCCGGTTGG                        |
| S2_D755A_revT | ATTATCCTTAGCCATGACAACAACATTATTCGTCTTCGG   |
| S2_D755A_revS | AACATTATTCGTCTTCGG                        |
| S2_D757A_forT | CATGGATAAGGCTAATAAATTTATTTCCGGTTGGAAGTTGG |
| S2_D757A_forS | ATTTCCGGTTGGAAGTTGG                       |
| S2_D757A_revT | AAATTTATTAGCCTTATCCATGACAACAACATTATTCGT   |
| S2_D757A_revS | ACAACAACATTATTCGT                         |
| S2_F760A_forT | GATAATAAAGCTATTTCCGGTTGGAAGTTGGATGTTGATTC |
| S2_F760A_forS | TGGAAGTTGGATGTTGATTC                      |
| S2_F760A_revT | ACCGGAAATAGCTTTATTATCCTTATCCATGACAACAAC   |
| S2_F760A_revS | CTTATCCATGACAACAAC                        |
| S2_S762A_forT | AAATTTATTGCCGGTTGGAAGTTGGATGTTGATTCTCAG   |
| S2_S762A_forS | TTGGATGTTGATTCTCAG                        |
| S2_S762A_revT | CTTCCAACCGGCAATAAATTTATTATCCTTATCCATGAC   |
| S2_S762A_revS | ATTATCCTTATCCATGAC                        |



---

|               |                                              |
|---------------|----------------------------------------------|
| S2_W764A_forT | ATTTCCGGTGCGAAGTTGGATGTTGATTCTCAGCAGTAT      |
| S2_W764A_forS | GTTGATTCTCAGCAGTAT                           |
| S2_W764A_revT | ATCCAAC TTCGACCGGAAATAAATTTATTATCCTTATCC     |
| S2_W764A_revS | AAATTTATTATCCTTATCC                          |
| S2_D767A_forT | TGGAAGTTGGCTGTTGATTCTCAGCAGTATAAAAACTACG     |
| S2_D767A_forS | AGCAGTATAAAAACTACG                           |
| S2_D767A_revT | GAGAATCAACAGCCAAC TTCCAACCGGAAATAAATTTATTATC |
| S2_D767A_revS | ACCGGAAATAAATTTATTATC                        |

---
